# Supplementary material for: Reconstructing dynamics of the Baltic Ice Stream Complex during deglaciation of the Last Scandinavian Ice Sheet
Source: Copernicus journal article supplement (doi:10.5194/tc-18-2407-2024), 2024-05-16
Supplement: Supplementary file 1 [file tc-18-2407-2024-supplement.pdf]

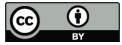

*Supplement of*

## **Reconstructing dynamics of the Baltic Ice Stream Complex during deglaciation of the Last Scandinavian Ice Sheet**

**Izabela Szuman et al.**

*Correspondence to:* Izabela Szuman (szuman@amu.edu.pl)

The copyright of individual parts of the supplement might differ from the article licence.

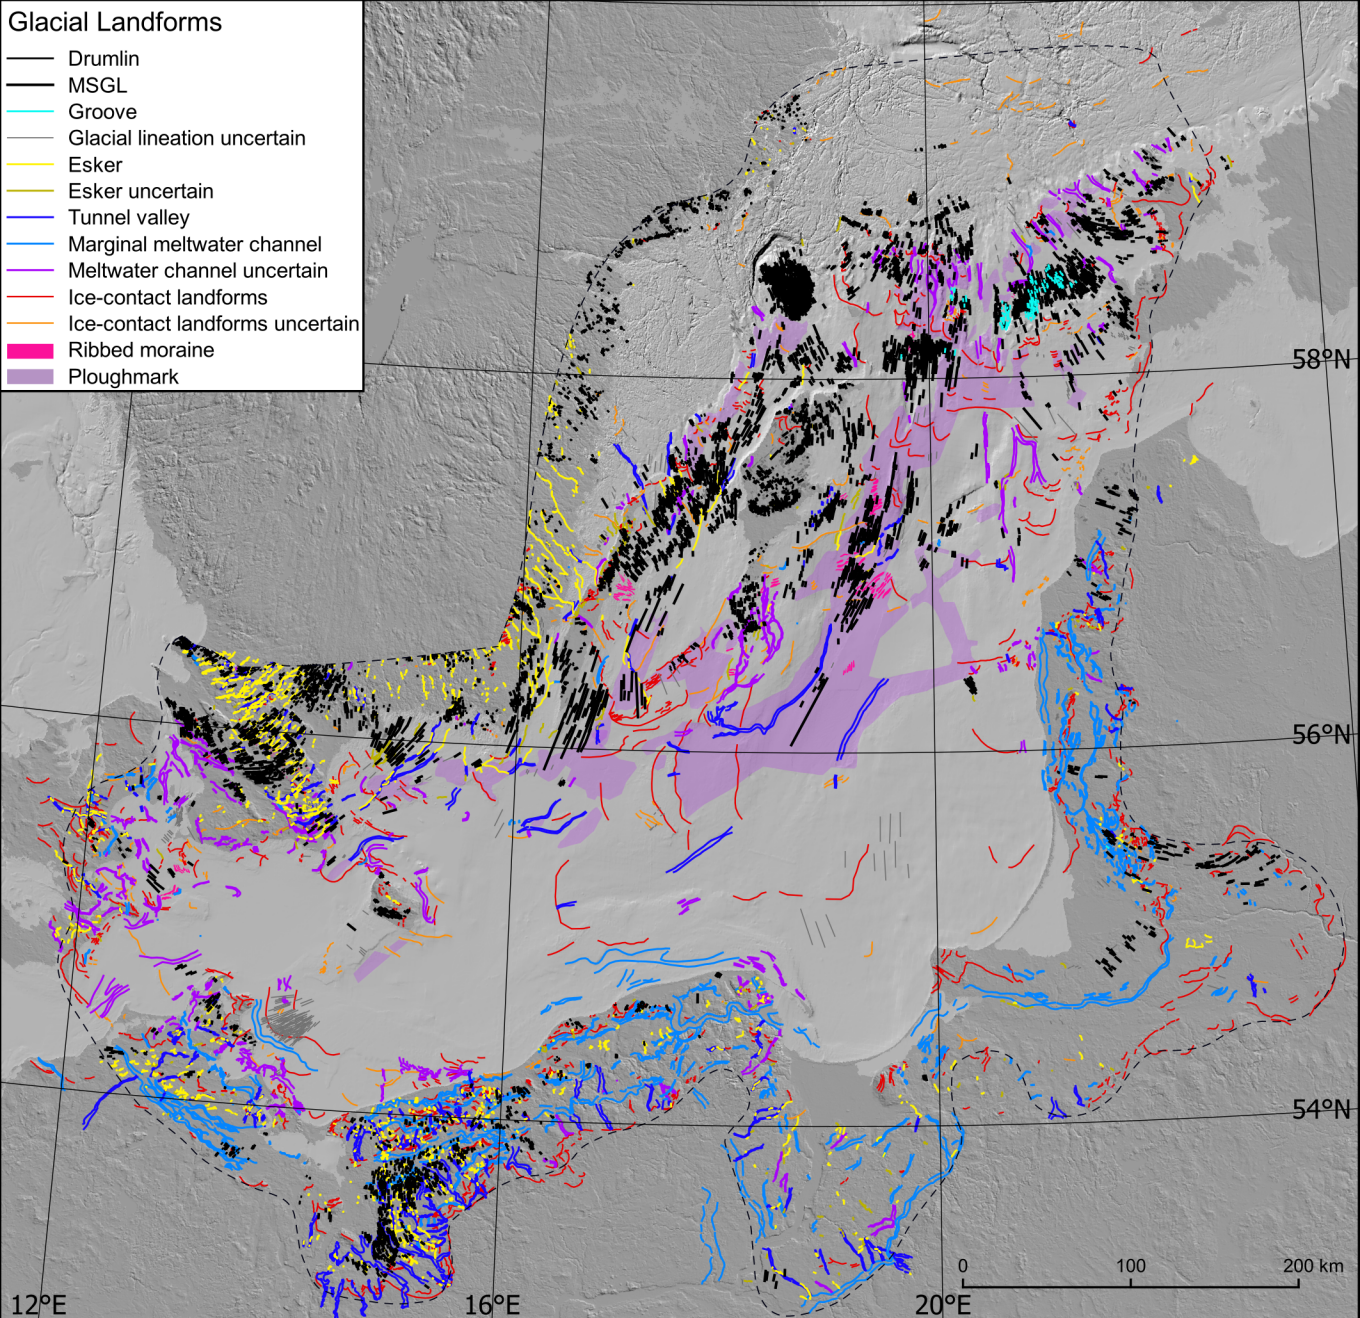

**Figure S1. Landforms mapped in this study in a high resolution version. Study area is indicated with dashed line. Light and dark grey indicate onshore and offshore areas respectively. The DEM is based on EU-DEM and EMODnet (see Table 2).**
